# Supplementary material
Source: MDPI journal article supplement (https://www.mdpi.com/2624-599X/1/3/33)
Supplement: s1 [file s1]

# Simulations and Subjective Rating of Acoustic Conditions in a Symphony Orchestra—A Case Study

Magne Skålevik <sup>1,2</sup>

<sup>1</sup> AKUTEK; 3430 Spikkestad, Norway

<sup>2</sup> Brekke & Strand, 0275, Oslo, Norway, msk@brekkestrand.no; Tel.: +47-4147-9375

## Three-dimensional models of the venues

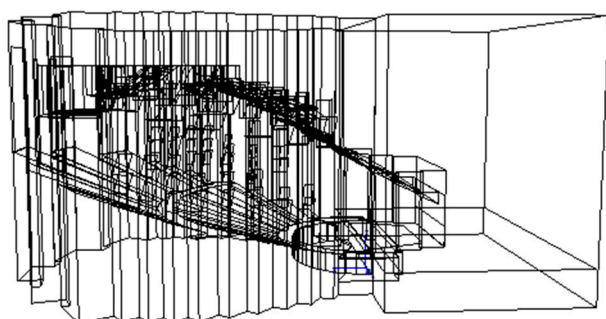

Odion©1985-2015. Licensed to: License information (single unavailable at start up)

GS (stage) and GP (pit)

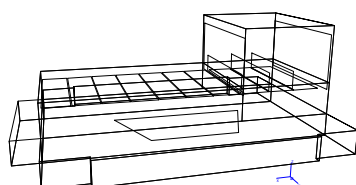

Odion©1985-2015. Licensed to: License information (single unavailable at start up)

PG (rehearsal studio)

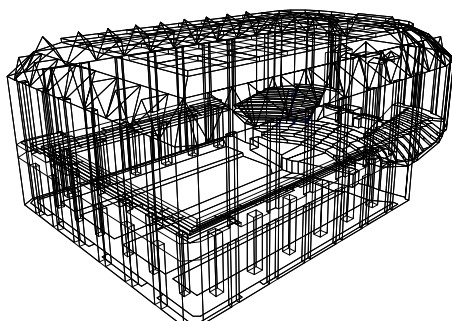

Odion©1985-2015. Licensed to: License information (single unavailable at start up)

AC

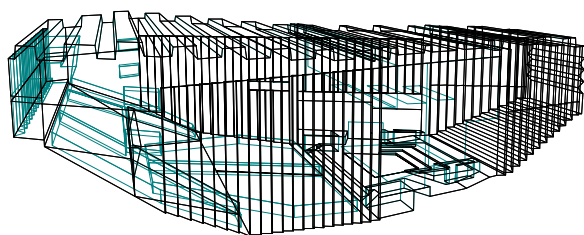

Odeon©1985-2015 Licensed to: License Information (single unavailable at start up)

OKH1 and OKH2

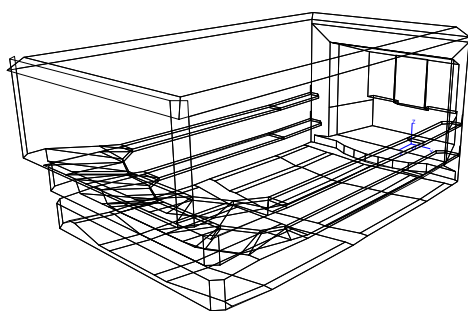

Odeon©1985-2015 Licensed to: License Information (single unavailable at start up)

BSH

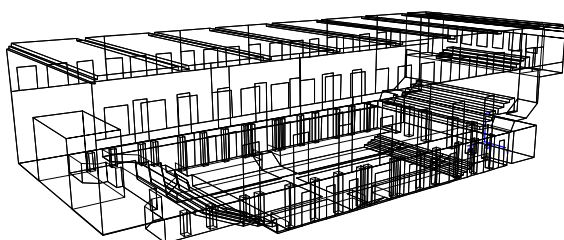

Odeon©1985-2015 Licensed to: License Information (single unavailable at start up)

VM

### Orchestra model positioned in PG

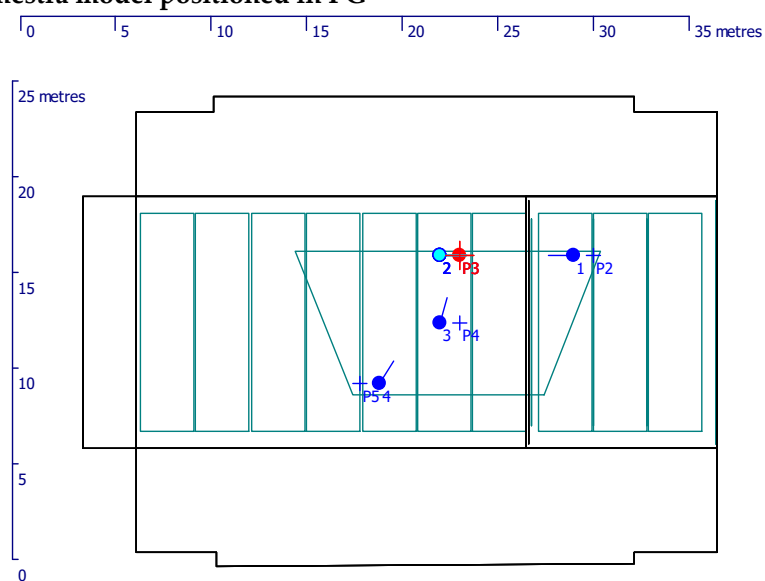

Odeon©1985-2015 Licensed to: Brekke & Strand Akustikk AS, Norway

**Above:** Footprint of the PG model with the orchestra model shaped as a 4-sided polygon surface, hovering 1.2 m above floor level with a total area of 98 m<sup>2</sup>. The dot with a cross is the position referred to as KM in the text. The dot “2” is used to simulate ST-parameters in the source receiver combination at a 1-m distance from KM.

### Orchestra Model with source–receiver grid

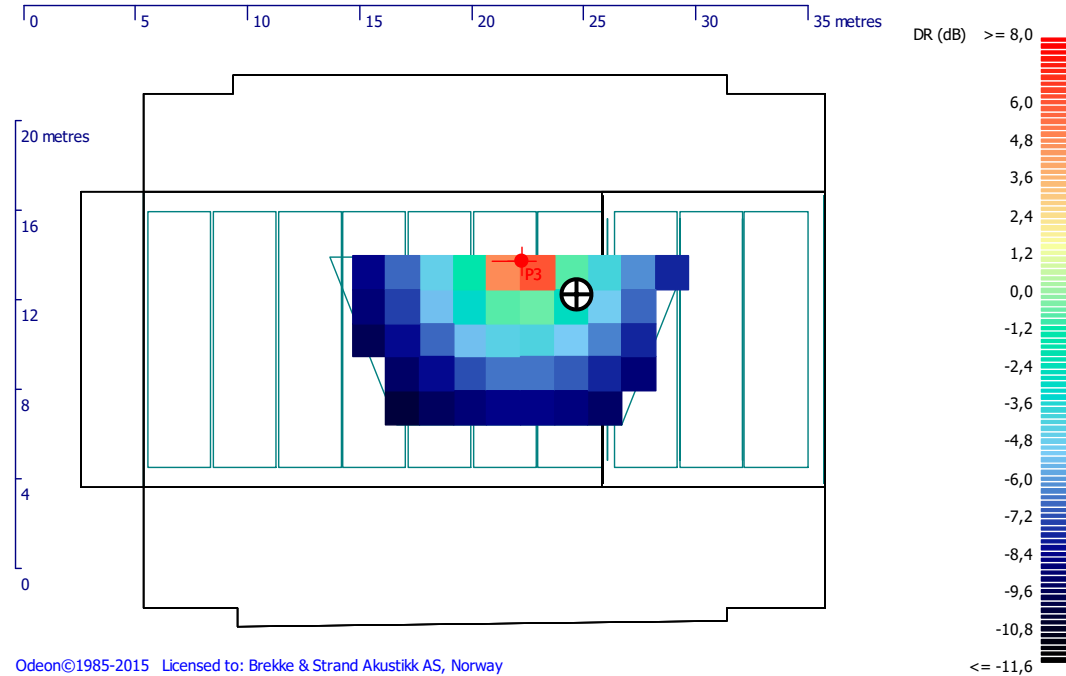

Odeon©1985-2015 Licensed to: Brekke & Strand Akustikk AS, Norway

**Above:** Footprint of the PG model with orchestra: The colors represent simulated values of D-R for different positions relative to KM (cross) and distributed over a 43-point grid (1.5-m spacing) over the orchestra
